# Supplementary material for: An Evidence-Based Antimicrobial Stewardship Smartphone App for Hospital Outpatients: Survey-based Needs Assessment Among Patients
Source: PubMed Central journal article supplement (PMC4954917; doi:10.2196/mhealth.5243), 2016-07-06
Supplement: mhealth_v4i3e83_app1.pdf [file mhealth_v4i3e83_app1.pdf]

| Q6. Which of the following do you have and what do you use it for? <i>(Skip to Q9 if you do not have a computer, smartphone or tablet computer).</i> | I don't have one         | Make/receive calls       | Internet access          | Playing games            | Download 'apps'          | Access medical or health information |
|------------------------------------------------------------------------------------------------------------------------------------------------------|--------------------------|--------------------------|--------------------------|--------------------------|--------------------------|--------------------------------------|
| (i) Desktop or laptop computer                                                                                                                       | <input type="checkbox"/> | <input type="checkbox"/> | <input type="checkbox"/> | <input type="checkbox"/> | <input type="checkbox"/> | <input type="checkbox"/>             |
| (ii) Android smartphone e.g. <i>Samsung Galaxy</i>                                                                                                   | <input type="checkbox"/> | <input type="checkbox"/> | <input type="checkbox"/> | <input type="checkbox"/> | <input type="checkbox"/> | <input type="checkbox"/>             |
| (iii) Android tablet e.g. <i>Kindle Fire</i>                                                                                                         | <input type="checkbox"/> | <input type="checkbox"/> | <input type="checkbox"/> | <input type="checkbox"/> | <input type="checkbox"/> | <input type="checkbox"/>             |
| (iv) Apple smartphone e.g. <i>iPhone</i>                                                                                                             | <input type="checkbox"/> | <input type="checkbox"/> | <input type="checkbox"/> | <input type="checkbox"/> | <input type="checkbox"/> | <input type="checkbox"/>             |
| (v) Apple tablet e.g. <i>iPad</i>                                                                                                                    | <input type="checkbox"/> | <input type="checkbox"/> | <input type="checkbox"/> | <input type="checkbox"/> | <input type="checkbox"/> | <input type="checkbox"/>             |
| (vi) Windows-based smartphone e.g. <i>Nokia Lumia</i>                                                                                                | <input type="checkbox"/> | <input type="checkbox"/> | <input type="checkbox"/> | <input type="checkbox"/> | <input type="checkbox"/> | <input type="checkbox"/>             |
| (vii) Windows-based tablet e.g. <i>Microsoft Surface</i>                                                                                             | <input type="checkbox"/> | <input type="checkbox"/> | <input type="checkbox"/> | <input type="checkbox"/> | <input type="checkbox"/> | <input type="checkbox"/>             |
| (viii) Blackberry smartphone                                                                                                                         | <input type="checkbox"/> | <input type="checkbox"/> | <input type="checkbox"/> | <input type="checkbox"/> | <input type="checkbox"/> | <input type="checkbox"/>             |
| (ix) Other computing device. Please specify:                                                                                                         | <input type="checkbox"/> | <input type="checkbox"/> | <input type="checkbox"/> | <input type="checkbox"/> | <input type="checkbox"/> | <input type="checkbox"/>             |

.....

Q7. Do you use any apps about health, health care, medicines or illnesses on your mobile device (smartphone or tablet computer)?

Yes  No

If yes, can you tell us the name of the apps?.....

Q8. Thinking about infections and antibiotics, for which of the following would you use an app?

**(please select all that apply)**

- Find information about usual length of illness caused by common infections
- Find information about how I can treat my symptoms
- Find information about whether or not antibiotics are needed
- Find out about the side effects of antibiotics
- Find out if I need to see my doctor
- Find out about the signs of bacterial versus viral chest infections
- Find tips on how to reduce the risk of getting common infections
- Recording of antibiotic treatment information by you or your doctor
- Other. Please describe:.....

Q9. How would you feel if a doctor used a smartphone or tablet computer to find healthcare information in front of you?

- Fine, no problem
- Not fine, they should not be using it
- Depends on the situation
- Other. Please describe: .....

Q10. Please provide any further feedback that you would like to give about the topic of the survey e.g. recent antibiotic experience, or about the survey itself:

Q11. (a) About you. Are you: Male  Female

(b) What is your age? .....

- (c) Education:  Degree, or Degree equivalent and above  
 Other qualifications  
 No qualifications

Q12. Would you be interested in any of the following?

- I would like to receive a summary of the results
- I would like to be invited for future research in this area

**Please provide your contact details if you selected one or both of the above in Q12.**

Name: ..... Email: .....

**Please provide your contact details if you would like to be entered into the prize draw:**

Name: ..... Email: .....

**Thank you for your time.**  
Please return the questionnaire to the hospital pharmacy staff or place in the **'Antibiotics and mobile device questionnaire' box at the pharmacy reception.** For more information, email pocast@imperial.nhs.uk

\*Closing date for the prize draw is 26<sup>th</sup> September 2014. Only eligible participants who are 18 years or over, have fully completed the questionnaire, and provided their contact details will be entered into the prize draw to win the £30 Amazon voucher. The winner will be drawn randomly and contacted via the email address provided by 14<sup>th</sup> October 2014. \*\*Antibiotic use includes any medicines used for an infection, by any route of administration (including eye drops, tablets, and injections), and obtained by any method (e.g. prescription, internet, over the counter).
